# Supplementary material for: Efficient artificial light-harvesting system constructed from supramolecular polymers with AIE property
Source: Royal Society of Chemistry journal article supplement (doi:10.1039/d1ra06239e), 2021-01-01
Supplement: d1ra06239e1.pdf [file d1ra06239e1.pdf]

## Electronic Supplementary Information

### Efficient artificial light-harvesting system fabricated in aqueous media based on supramolecular polymers with AIE property

Tangxin Xiao,\* Yong Shen, Cheng Bao, Kai Diao, Dongxing Ren, Hongwei Qian  
and Liangliang Zhang

School of Petrochemical Engineering, Changzhou University, Changzhou, 213164, China.

E-mail: xiaotangxin@cczu.edu.cn

### Table of contents

|                                                                      |     |
|----------------------------------------------------------------------|-----|
| 1. Materials, methods, and abbreviations.....                        | S2  |
| 2. Specific viscosity of <b>M</b> .....                              | S4  |
| 3. Fluorescence lifetime measurements.....                           | S4  |
| 4. Quantum yield measurements.....                                   | S5  |
| 5. Energy-transfer efficiency calculation.....                       | S6  |
| 6. Antenna effect (AE) calculation.....                              | S8  |
| 7. Control experiment of compound <b>A</b> for light-harvesting..... | S10 |
| 8. Synthesis of <b>M</b> .....                                       | S10 |
| 9. References.....                                                   | S12 |

## **1. Materials, methods, and abbreviations**

### **General**

All chemicals, reagents and solvents were purchased from commercial suppliers and used, unless otherwise stated, without further purification. If needed, solvents were dried by literature known procedures. All yields were given as isolated yields.

### **NMR spectroscopy**

The  $^1\text{H}$  NMR spectra were recorded with a Bruker AVANCE III (300 MHz) and  $^{13}\text{C}$  NMR spectra were recorded with a Bruker AVANCE III (500 MHz) spectrometer and calibrated against the residual proton signal or natural abundance carbon resonance of the used deuterated solvent from tetramethylsilane (TMS) as the internal standard. The chemical shifts  $\delta$  are indicated in ppm and the coupling constants  $J$  in Hz. The multiplicities are given as s (singlet), d (doublet), t (triplet), and m (multiplet).

### **Mass spectrometry**

High-resolution electrospray ionization mass spectra (HR-ESI-MS) were recorded on an Agilent Technologies 6540 UHD Accurate-Mass.

### **Transmission electron microscope (TEM)**

TEM investigations were carried out on a JEM-2100 instrument.

### **Dynamic light scattering (DLS)**

DLS measurements were carried out on a Brookhaven BI-9000AT system, equipped with a 200 mW polarized laser source ( $\lambda = 514 \text{ nm}$ ) at a scattering angle of  $90^\circ$ . All samples were prepared according to the corresponding procedures mentioned above.

### **UV-Vis spectroscopy**

The UV-Vis absorption spectra were measured on a Perkin Elmer Lambda 35 UV-Vis Spectrometer.

### **Fluorescence spectroscopy**

Fluorescence measurements were performed on an Agilent Cary Eclipse spectrofluorometer.

## **Fluorescence lifetimes**

The fluorescence lifetimes were measured employing time correlated single photon counting on a FLS980 instrument with a pulsed xenon lamp. Analysis of fluorescence decay curves were subjected to fit a mono-exponential or bi-exponential decay. The instrument response function (IRF) measures the scattering of laser excitation from non-fluorescent control samples to determine the fastest possible response of the detectors.

## **Quantum yields**

The quantum yields were carried out on a FLS980 instrument with the integrating sphere.

## **CIE coordinates**

The CIE (Commission Internationale de l'Eclairage) 1931 coordinates were calculated with the method of color matching functions.

## **Viscometry**

Viscosity measurements were carried out with Ubbelohde micro viscometers (Shanghai Liangjing Glass Instrument Factory, 0.40 mm inner diameter) at 298 K in chloroform.

## **Abbreviations**

UPy = 2-ureido-4[1H]-pyrimidinone; NPs = nanoparticles; DCM = dichloromethane

CHCl<sub>3</sub> = trichloromethane; M = mol/L; br = broad; Ar = aromatic group

## 2. Specific viscosity of **M**

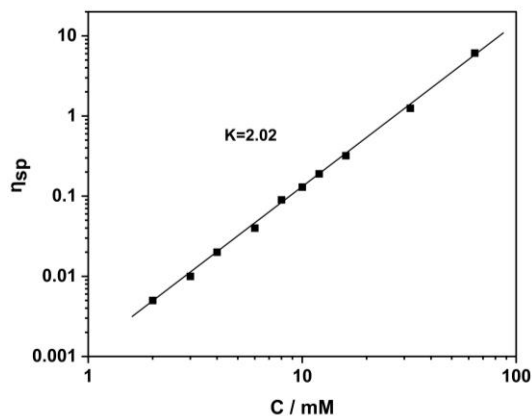

**Fig. S1.** Specific viscosity of **M** in  $\text{CHCl}_3$  solutions versus the concentration (298 K). Values on the curves indicate the slope.

## 3. Fluorescence lifetime measurements

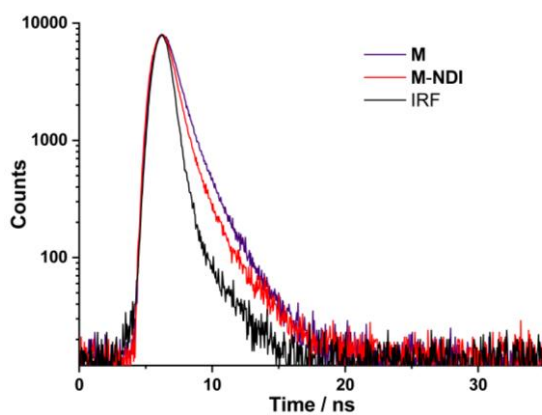

**Fig. S2.** Fluorescence decay profiles of NPs of **M** (blue line) and **M-NDI** (red line).  $\lambda_{ex} = 365$  nm,  $[\text{M}] = 5 \times 10^{-5}$  M,  $[\text{NDI}] = 5 \times 10^{-7}$  M, respectively.

**Table S1.** Fluorescence lifetimes of **M-NDI** NPs (**M/NDI** = 100/1) upon excitation at 365 nm in aqueous solution,  $[\text{M}] = 5 \times 10^{-5}$  M,  $[\text{NDI}] = 5 \times 10^{-7}$  M, respectively.

| Sample                                            | $\tau_1/\text{ns}$ | RW1[%] | $\tau_2/\text{ns}$ | RW2[%] | $\tau/\text{ns}$ | $\chi^2$ |
|---------------------------------------------------|--------------------|--------|--------------------|--------|------------------|----------|
| <b>M</b>                                          | 1.61               | 48.3   | 6.61               | 51.7   | 4.20             | 1.160    |
| <b>M-NDI</b><br>( <b>M</b> : <b>NDI</b> = 100: 1) | 0.60               | 31.8   | 4.87               | 63.2   | 3.30             | 1.095    |

## 4. Quantum yield measurements

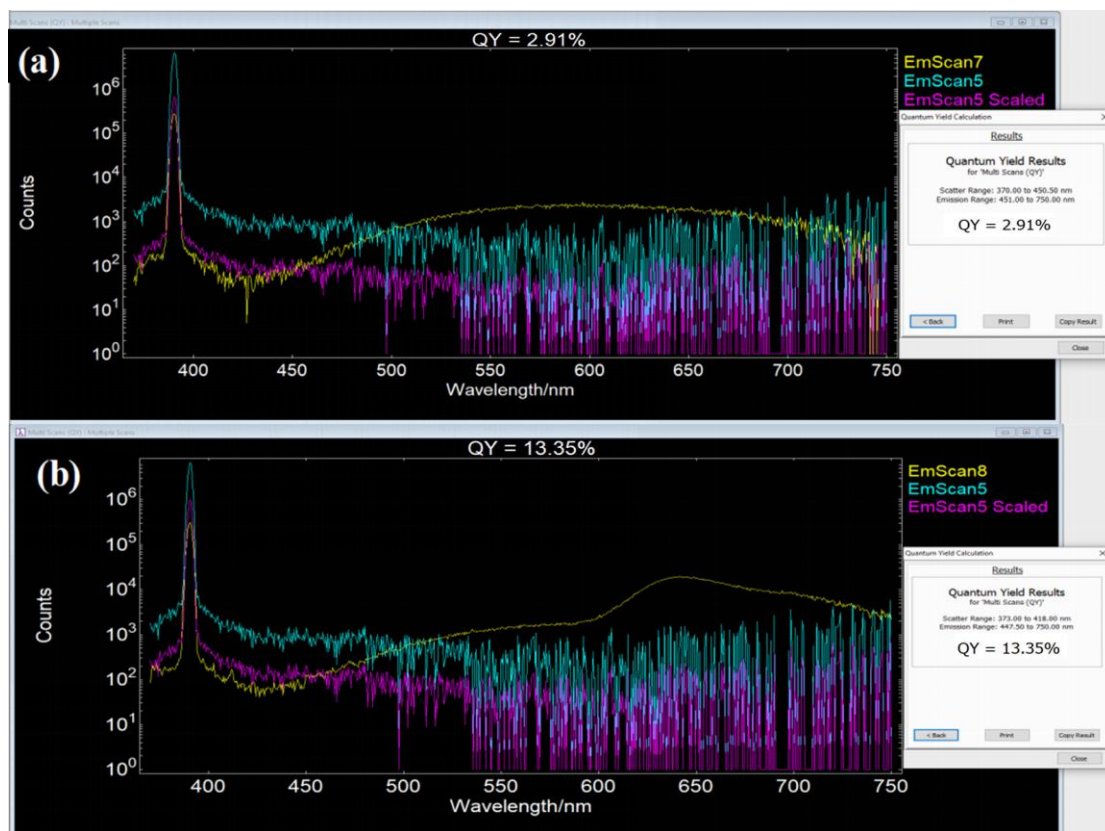

**Fig. S3.** Absolute fluorescence quantum yields ( $\Phi_{f(abs)}$ ) of (a) NPs of **M**, (b) NPs of **M-NDI** (M/NDI = 100/1), upon excitation at 390 nm.  $[M] = 5 \times 10^{-5}$  M,  $[NDI] = 5 \times 10^{-7}$  M.

**Table S2.** Fluorescence quantum yields of NPs of **M** and **M-NDI**.  $[M] = 5 \times 10^{-5}$  M,  $[NDI] = 5 \times 10^{-7}$  M, respectively.

| Sample                         | Fluorescence quantum yields |
|--------------------------------|-----------------------------|
|                                | ( $\Phi_{f(abs)}$ )         |
| <b>M</b>                       | 2.91%                       |
| <b>M-NDI (M: NDI = 100: 1)</b> | 13.35%                      |

## 5. Energy-transfer efficiency calculation

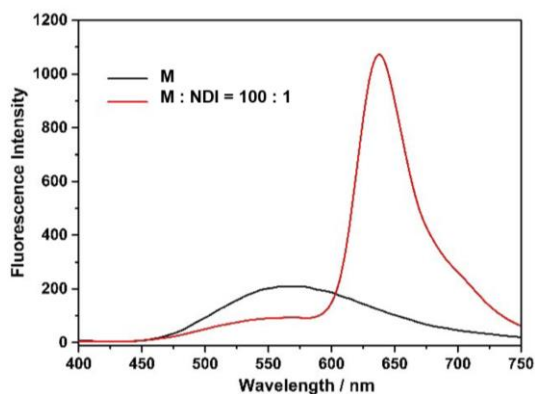

**Fig. S4.** Fluorescence spectra of **M** and **M-NDI** assembly upon excitation at 390 nm. NPs of **M** (black line), NPs of **M-NDI** (red line), respectively.  $[M] = 5 \times 10^{-5} \text{ M}$ ,  $[NDI] = 5 \times 10^{-7} \text{ M}$ .

Energy-transfer efficiency ( $\Phi_{ET}$ ) was calculated from fluorescence spectra through the equation S1<sup>[S1]</sup>:

$$\Phi_{ET} = 1 - I_{DA} / I_D \text{ (eq. S1)}$$

Where  $I_{DA}$  and  $I_D$  are the fluorescence intensities of NPs of **M-NDI** (donor and acceptor) and NPs of **M** (donor) at 565 nm when excited at 390 nm, respectively.

The energy-transfer efficiency ( $\Phi_{ET}$ ) was calculated as 58.2% in water, measured under the condition of  $[M] = 5 \times 10^{-5} \text{ M}$ ,  $[NDI] = 5 \times 10^{-7} \text{ M}$ ,  $\lambda_{ex} = 390 \text{ nm}$ .

**Table S3.** Energy-transfer efficiency with different D/A ratio.

| Sample                          | Concentration,<br>respectively  | Energy-transfer efficiency<br>( $\Phi_{ET}$ ) |
|---------------------------------|---------------------------------|-----------------------------------------------|
| <b>M-NDI (M: NDI = 100: 1)</b>  | [M] = $5 \times 10^{-5}$ M      | 58.2%                                         |
|                                 | [NDI] = $5 \times 10^{-7}$ M    |                                               |
| <b>M-NDI (M: NDI = 150: 1)</b>  | [M] = $5 \times 10^{-5}$ M      | 48.9%                                         |
|                                 | [NDI] = $3.33 \times 10^{-7}$ M |                                               |
| <b>M-NDI (M: NDI = 200: 1)</b>  | [M] = $5 \times 10^{-5}$ M      | 38.3%                                         |
|                                 | [NDI] = $2.5 \times 10^{-7}$ M  |                                               |
| <b>M-NDI (M: NDI = 300: 1)</b>  | [M] = $5 \times 10^{-5}$ M      | 29.5%                                         |
|                                 | [NDI] = $1.67 \times 10^{-7}$ M |                                               |
| <b>M-NDI (M: NDI = 400: 1)</b>  | [M] = $5 \times 10^{-5}$ M      | 23.9%                                         |
|                                 | [NDI] = $1.25 \times 10^{-7}$ M |                                               |
| <b>M-NDI (M: NDI = 500: 1)</b>  | [M] = $5 \times 10^{-5}$ M      | 19.2%                                         |
|                                 | [NDI] = $1 \times 10^{-7}$ M    |                                               |
| <b>M-NDI (M: NDI = 750: 1)</b>  | [M] = $5 \times 10^{-5}$ M      | 11.5%                                         |
|                                 | [NDI] = $6.67 \times 10^{-8}$ M |                                               |
| <b>M-NDI (M: NDI = 1500: 1)</b> | [M] = $5 \times 10^{-5}$ M      | 10.7%                                         |
|                                 | [NDI] = $3.33 \times 10^{-8}$ M |                                               |
| <b>M-NDI (M: NDI = 3000: 1)</b> | [M] = $5 \times 10^{-5}$ M      | 7.4%                                          |
|                                 | [NDI] = $3.67 \times 10^{-8}$ M |                                               |

## 6. Antenna effect (AE) calculation

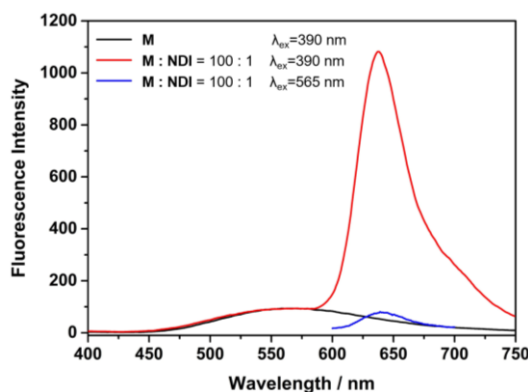

**Fig. S5.** Fluorescence spectrum of **M** NPs and **M-NDI** NPs normalized at 565 nm, **M** NPs (black line), **M-NDI** NPs (red line), respectively,  $\lambda_{\text{ex}} = 390$  nm. The blue line represents the fluorescence spectrum of **M-NDI** NPs,  $\lambda_{\text{ex}} = 565$  nm.  $[\text{M}] = 5 \times 10^{-5}$  M,  $[\text{NDI}] = 5 \times 10^{-7}$  M.

The antenna effect (AE) was calculated based on the emission spectra using equation S2<sup>[S1]</sup>:

$$\text{AE} = I'_{\text{DA},390} / I_{\text{DA},565} = (I_{\text{DA},390} - I_{\text{D},390}) / I_{\text{DA},565} \text{ (eq. S2)}$$

Where  $I_{\text{DA},390}$  and  $I_{\text{DA},565}$  are the fluorescence intensities at 640 nm with the excitation of the light-harvesting NPs at 390 nm and at 565 nm, respectively.  $I_{\text{D},390}$  refers to the fluorescence intensity at 640 nm after the emission spectra of **M** NPs and **M-NDI** NPs are normalized at 565 nm under excitation at 390 nm.

The antenna effect value was calculated as 16.0 in water, measured under the condition of  $[\text{M}] = 5 \times 10^{-5}$  M, and  $[\text{NDI}] = 1 \times 10^{-7}$  M, respectively.

**Table S4.** Antenna effect with different donor/acceptor ratios.

| Sample                   | Concentration,<br>respectively                                | Antenna Effect (AE) |
|--------------------------|---------------------------------------------------------------|---------------------|
| M-NDI (M: NDI = 100: 1)  | [M] = $5 \times 10^{-5}$ M<br>[NDI] = $5 \times 10^{-7}$ M    | 11.9                |
| M-NDI (M: NDI = 150: 1)  | [M] = $5 \times 10^{-5}$ M<br>[NDI] = $3.33 \times 10^{-7}$ M | 12.6                |
| M-NDI (M: NDI = 200: 1)  | [M] = $5 \times 10^{-5}$ M<br>[NDI] = $2.5 \times 10^{-7}$ M  | 14.3                |
| M-NDI (M: NDI = 300: 1)  | [M] = $5 \times 10^{-5}$ M<br>[NDI] = $1.67 \times 10^{-7}$ M | 15.1                |
| M-NDI (M: NDI = 400: 1)  | [M] = $5 \times 10^{-5}$ M<br>[NDI] = $1.25 \times 10^{-7}$ M | 15.5                |
| M-DBT (M: DBT = 500: 1)  | [M] = $5 \times 10^{-5}$ M<br>[NDI] = $1 \times 10^{-7}$ M    | 16.0                |
| M-NDI (M: NDI = 750: 1)  | [M] = $5 \times 10^{-5}$ M<br>[NDI] = $6.68 \times 10^{-8}$ M | 15.9                |
| M-NDI (M: NDI = 1500: 1) | [M] = $5 \times 10^{-5}$ M<br>[NDI] = $3.33 \times 10^{-8}$ M | 15.3                |
| M-NDI (M: NDI = 3000: 1) | [M] = $5 \times 10^{-5}$ M<br>[NDI] = $1.67 \times 10^{-8}$ M | 14.7                |

## 7. Control experiment of compound A for light-harvesting

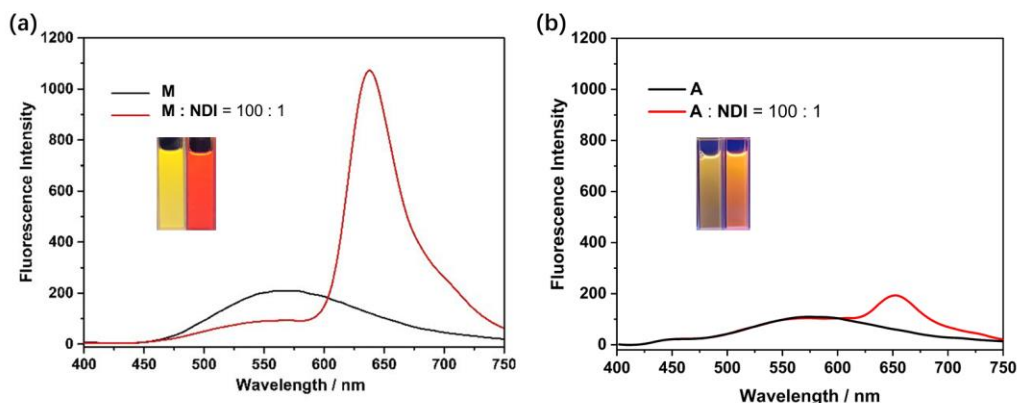

**Fig. S6.** (a) Fluorescence spectra of **M**, **M-NDI** upon excitation at 390 nm. (b) Fluorescence spectra of compound **A**, **A-NDI**. All these compounds are existed as NPs in water.  $[M] = 5 \times 10^{-5}$  M,  $[A] = 5 \times 10^{-5}$  M,  $[NDI] = 5 \times 10^{-7}$  M, respectively.

## 8. Synthesis of compound M

**A** (2.58 g, 5.5 mmol) and **B** (3.60 g, 11.9 mmol) were dissolved in dry  $\text{CHCl}_3$  (60 mL) and this solution was stirred for 12 h under nitrogen at room temperature. To the reaction mixture  $\text{CHCl}_3$  (20 mL) was added and the organic layer was washed with 1 M HCl (80 mL  $\times$  1), saturated  $\text{NaHCO}_3$  (80 mL  $\times$  3), brine (80 mL  $\times$  3), dried with anhydrous  $\text{MgSO}_4$  and concentrated under reduced pressure. Added about 50 mL of methanol and heated to reflux 3 h, cool to room temperature, suction filter to obtain white powder (4.27 g, 4.51 mmol). Yield: 82 %.  $^1\text{H}$  NMR (300 MHz,  $\text{CDCl}_3$ ):  $\delta$  (ppm) = 13.22 (s, 2H, NH), 12.00 (s, 2H, NH), 10.37 (s, 2H, NH), 7.70 (d,  $J = 7.6$  Hz, 2H, Ar-*H*), 7.25-7.19 (m, 6H, Ar-*H*), 6.99-6.90 (m, 6H, Ar-*H*), 6.81 (d,  $J = 7.8$  Hz, 2H, Ar-*H*), 5.81 (s, 2H, alkene-*H*), 4.13 (t,  $J = 6.3$  Hz, 4H,  $\text{OCH}_2$ ), 3.56-3.48 (m, 4H,  $\text{NCH}_2$ ), 2.33-2.25 (m, 2H,  $\text{CH}=\text{CR}-\text{CH}-\text{R}_2$ ), 2.20-2.15 (m, 4H, alkyl-*H*), 1.71-1.50 (m, 8H, alkyl-*H*), 1.29-1.19 (m, 8H, alkyl-*H*), 0.90-0.82 (m, 12H,  $\text{CH}_2\text{CH}_3$ ).  $^{13}\text{C}$  NMR (125 MHz,  $\text{CDCl}_3$ ):  $\delta$  (ppm) = 173.2, 159.4, 156.9, 155.6, 154.9, 145.8, 140.1, 139.2, 135.5, 133.1, 131.9, 127.1, 126.2, 124.6, 119.2, 114.6, 106.3, 65.7, 45.4, 37.2, 32.9, 29.3, 29.2, 26.6, 22.5, 13.9, 11.7. HR-ESI-MS:  $m/z$  calcd for  $[\text{C}_{56}\text{H}_{67}\text{N}_8\text{O}_6]^+ = 947.5178$ , found = 947.5173.

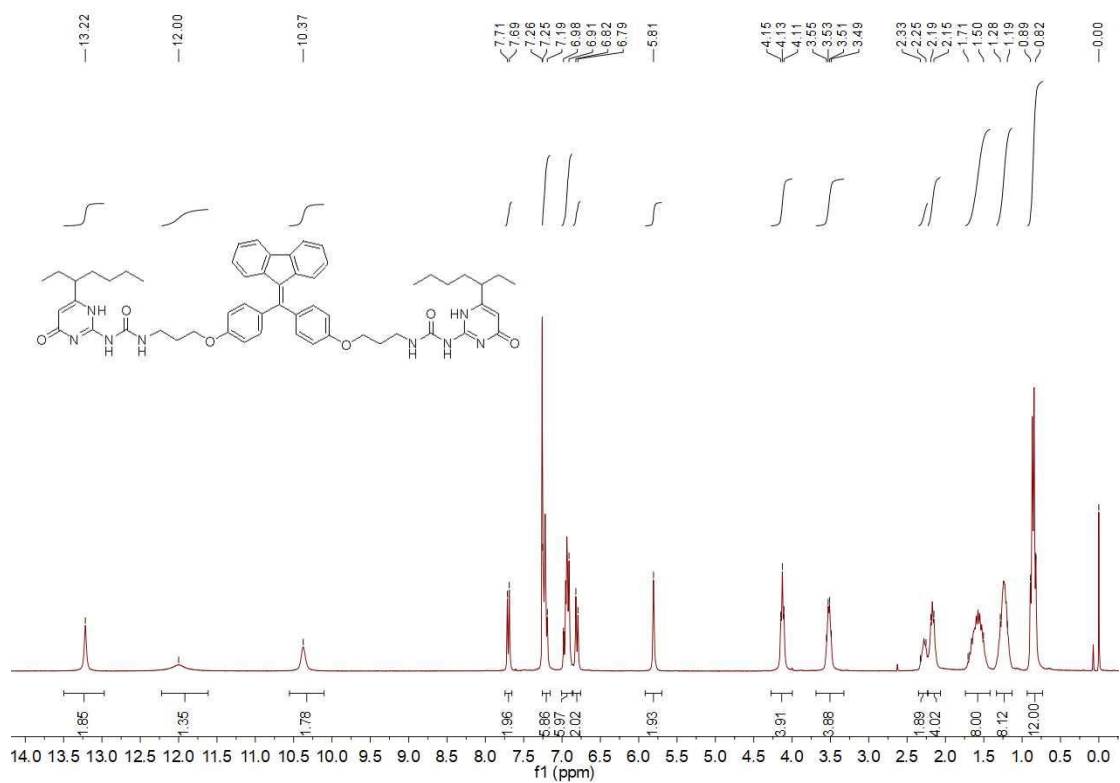

**Fig. S7.** <sup>1</sup>H NMR spectrum (300 MHz, CDCl<sub>3</sub>, 298 K) of compound **M**.

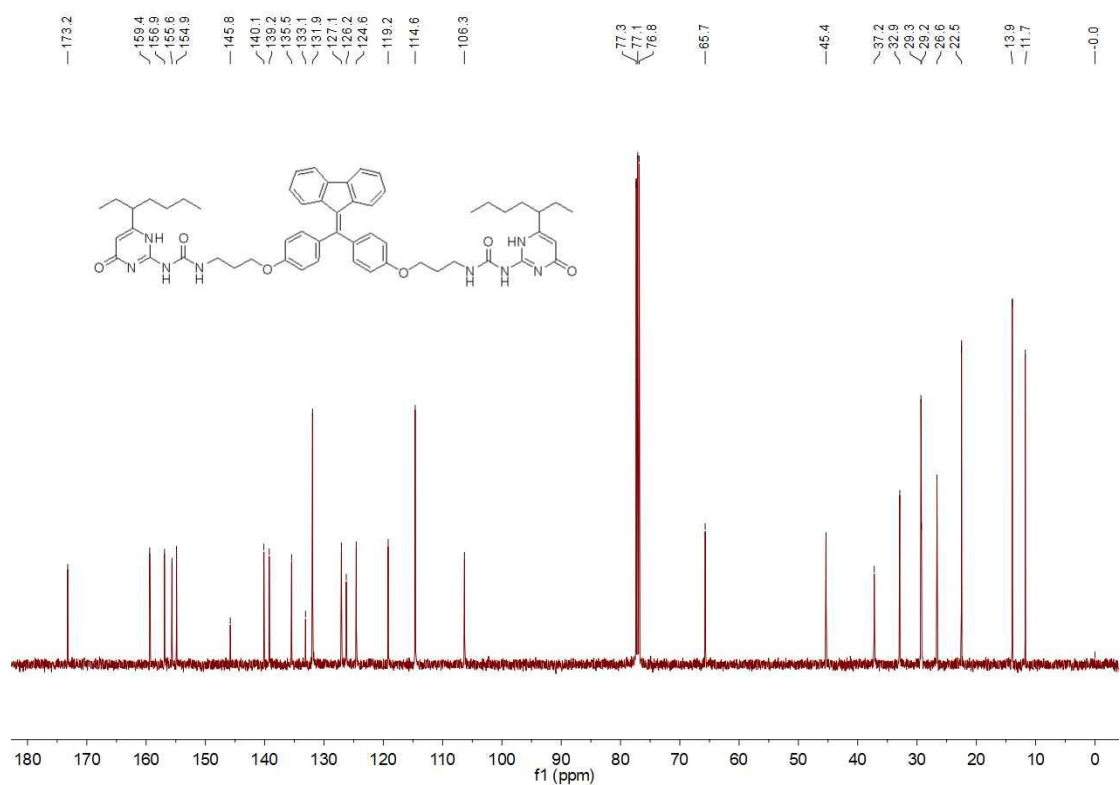

**Fig. S8.** <sup>13</sup>C NMR spectrum (125 MHz, CDCl<sub>3</sub>, 298 K) of compound **M**.

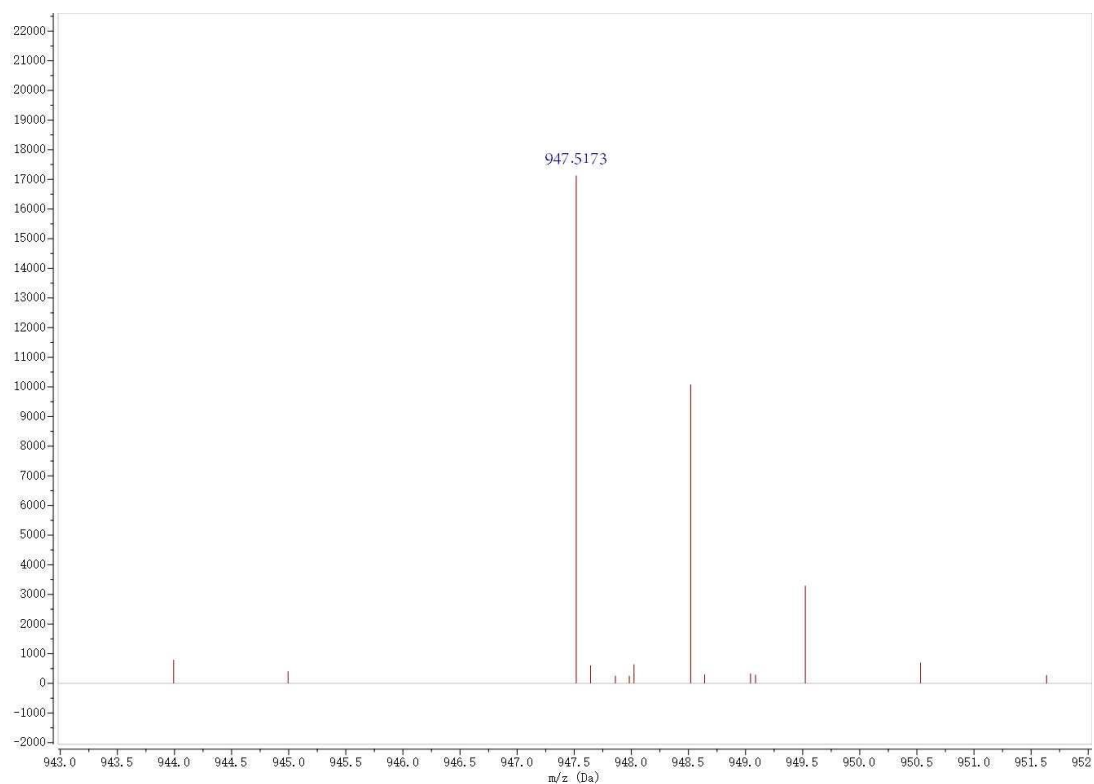

**Fig. S9.** HR-MS (ESI, positive mode, MeOH) of **M**.

## 9. References

[S1] Hao, M.; Sun, G.; Zuo, M.; Xu, Z.; Chen, Y.; Hu, X.-Y.; Wang, L. *Angew. Chem. Int. Ed.* 2020, **59**, 10095-10100.
